# Supplementary material
Source: Springer Nature journal article supplement (https://www.springermedizin.de/resource/supplementary/12931_2010_1046_MOESM5_ESM.pdf/9425522)

**A**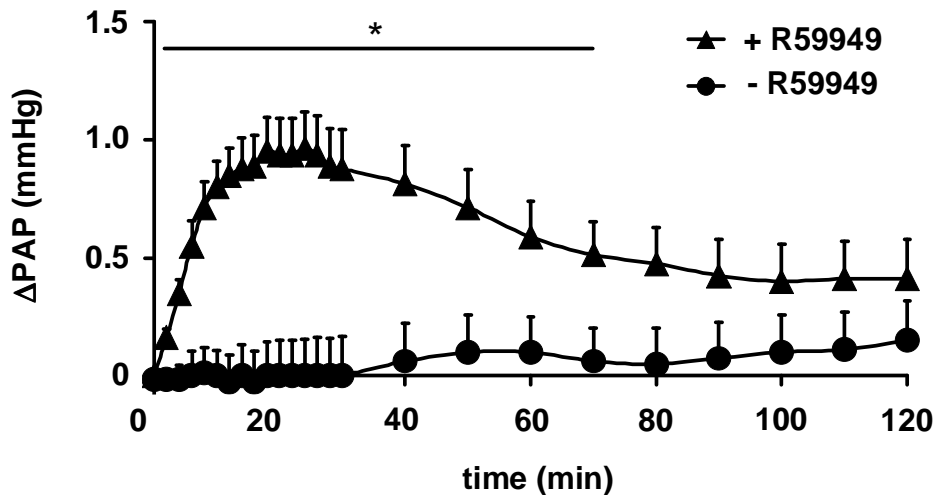**B**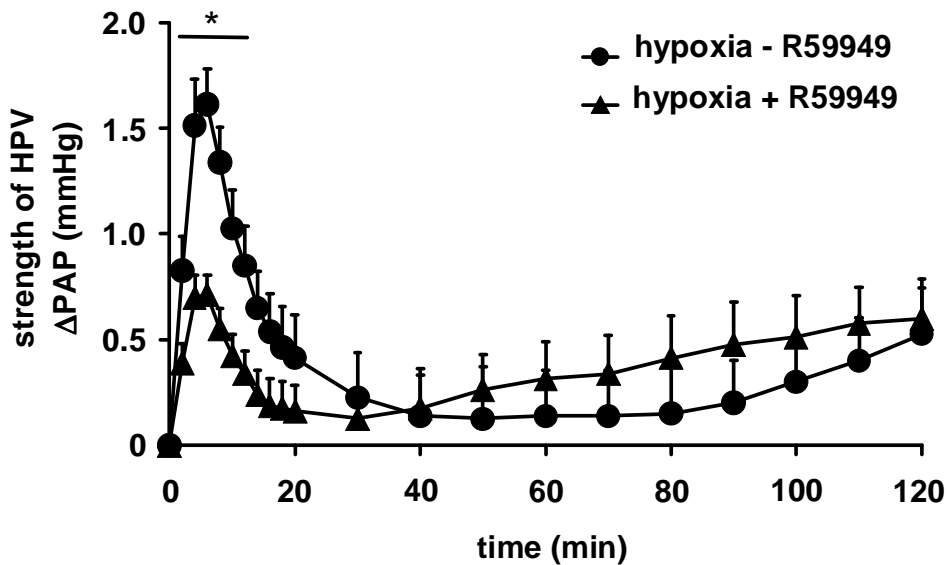

Supplement: MOESM5 [file 9425522]
